# Supplementary material for: Cladodionen Is a Potential Quorum Sensing Inhibitor Against Pseudomonas aeruginosa
Source: PubMed Central journal article supplement (PMC7230538; doi:10.3390/md18040205), 2020-04-10
Supplement: marinedrugs-18-00205-s001.pdf [file marinedrugs-18-00205-s001.pdf]

# Supporting Information

## Cladodionen, a Potential Quorum Sensing Inhibitor Against *Pseudomonas aeruginosa*

Mengjia Wang<sup>1,2,3</sup>, Lu Zhao<sup>1,2,3</sup>, Hao Wu<sup>1,2,3</sup>, Chaoyue Zhao<sup>1,2,3</sup>, Qianhong Gong<sup>1,2,3,\*</sup> and  
Wengong Yu<sup>1,2,3,\*</sup>

<sup>1</sup> School of Medicine and Pharmacy, Ocean University of China, 5 Yushan Road, Qingdao 266003, China; wangmengjia6877@stu.ouc.edu.cn (M.W.); zhaolu@stu.ouc.edu.cn (L.Z.); wuhao1330@stu.ouc.edu.cn (H.W.); zhaochaoyue2712@stu.ouc.edu.cn (C.Z.)

<sup>2</sup> Laboratory for Marine Drugs and Bioproducts, Qingdao National Laboratory for Marine Science and Technology, 1 Wenhai Road, Qingdao 266237, China

<sup>3</sup> Provincial Key Laboratory of Glycoscience and Glycotechnology, Ocean University of China, 5 Yushan Road, Qingdao 266003, China

\* Correspondence: gongqh@ouc.edu.cn (Q.G.); yuwg66@ouc.edu.cn (W.Y.); Tel: +86-532-82032067 (Q.G.); +86-532-82031680 (W.Y.)

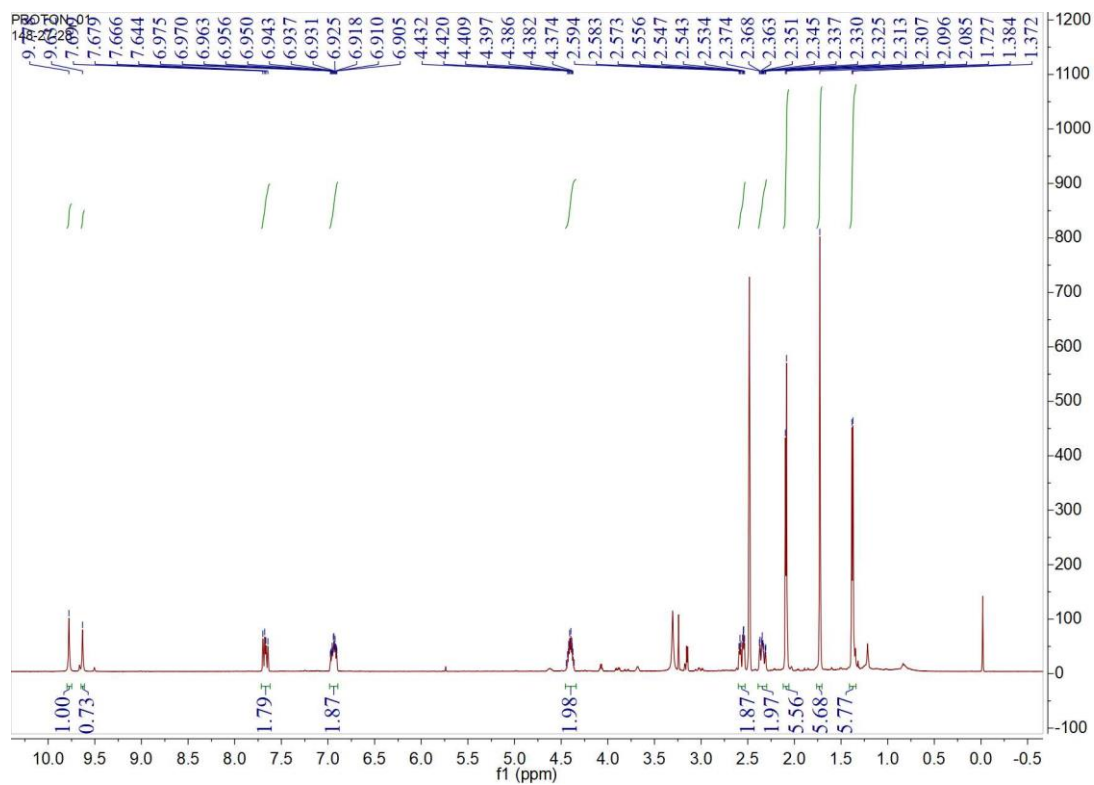

Figure S1. <sup>1</sup>H-NMR spectroscopy of the anti-QS compound (Solvent: DMSO-d<sub>6</sub>).

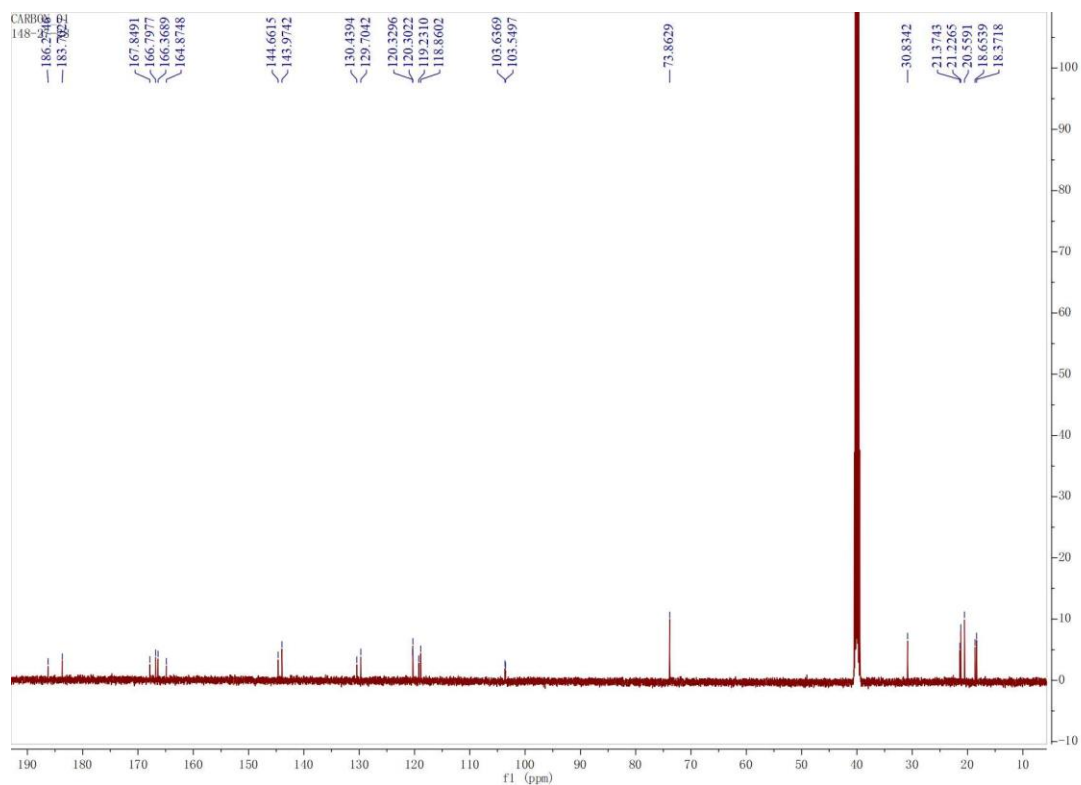

Figure S2. <sup>13</sup>C-NMR spectroscopy of the anti-QS compound (Solvent: DMSO-d<sub>6</sub>).

**Table S1.**  $^1\text{H}$  and  $^{13}\text{C}$  NMR Data for cladodionen.

| No. | a                |                                    | b                |                                    |
|-----|------------------|------------------------------------|------------------|------------------------------------|
|     | $\delta\text{C}$ | $\delta\text{H}$ , Mult. (J in Hz) | $\delta\text{C}$ | $\delta\text{H}$ , Mult. (J in Hz) |
| 1   | -                | 9.77, s                            | -                | 9.63                               |
| 2   | 166.80           |                                    | 164.9            |                                    |
| 3   | 103.6            |                                    | 103.5            |                                    |
| 4   | 183.7            |                                    | 186.3            |                                    |
| 5   | 129.7            |                                    | 130.4            |                                    |
| 6   | 166.3            |                                    | 167.8            |                                    |
| 7   | 120.3            | 7.70, d                            | 120.3            | 7.67, d                            |
| 8   | 144.0            | 6.96, m                            | 144.7            | 6.97, m                            |
| 9   | 30.8             | 2.35, m; 2.55, m                   | 30.8             | 2.33, m; 2.58, m                   |
| 10  | 73.9             | 4.40, m                            | 73.9             | 4.39, m                            |
| 11  | 20.6             | 1.38, d                            | 20.6             | 1.37, d                            |
| 12  | 118.9            |                                    | 119.2            |                                    |
| 13  | 21.2             | 1.73, s                            | 21.3             | 1.73, s                            |
| 14  | 18.7             | 2.09, s                            | 18.4             | 2.10, s                            |

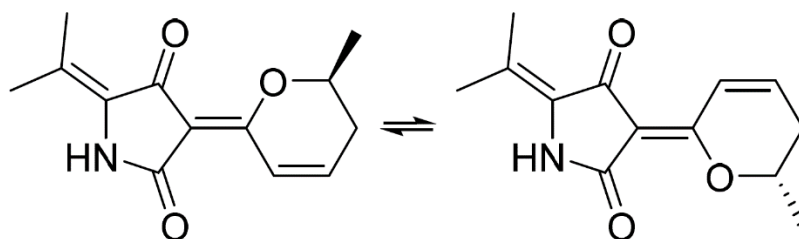

**Figure S3.** Chemical structure of cladodionen.

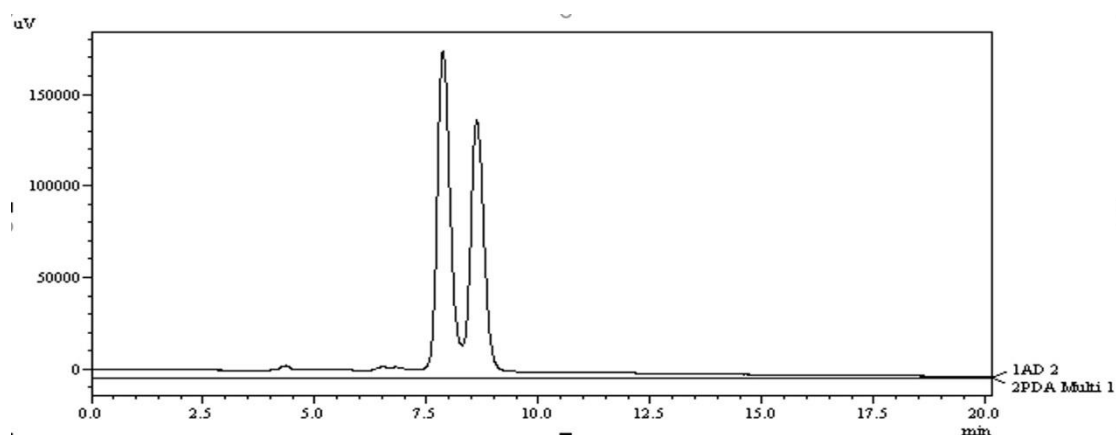

**Figure S4.** HPLC analysis of cladodionen.

**Table S2.** The primer sequences for real-time RT-PCR.

| Primers             | sequences (5' to 3')      | primers          | sequences (5' to 3')       |
|---------------------|---------------------------|------------------|----------------------------|
| <i>Rpsls</i><br>(F) | GCAACTATCAACCAGCTG<br>GTG | <i>Rpsls</i> (R) | GCTGTGCTCTTGCAGGTTGT<br>G  |
| <i>lasR</i> (F)     | ACGCTCAAGTGGAAAATT<br>GG  | <i>lasR</i> (R)  | TCGTAGTCCTGGCTGTCCTT       |
| <i>lasI</i> (F)     | GGCTGGGACGTTAGTGTC<br>AT  | <i>lasI</i> (R)  | AAAACCTGGGCTTCAGGAG<br>T   |
| <i>lasB</i> (F)     | ACCAGAAGATCGGCAAG<br>TAC  | <i>lasB</i> (R)  | GTTGACCTGCTTGTAGGTGT<br>TG |
| <i>rhlR</i> (F)     | CTGGGCTTCGATTA<br>CGC     | <i>rhlR</i> (R)  | CCCGTAGTTCTGCATCTGGT       |
| <i>rhlI</i> (F)     | AAGGACGTCTTCGCCTAC<br>CT  | <i>rhlI</i> (R)  | GCAGGCTGGACCAGAATAT<br>C   |
| <i>pqsR</i> (F)     | CTGATCTGCCGTAATTG<br>G    | <i>pqsR</i> (R)  | ATCGACGAGGAACTGAAGA<br>G   |
| <i>pqsA</i> (F)     | GACCGGCTGTATTCGATT<br>C   | <i>pqsA</i> (R)  | GCTGAACCAGGGAAAGAA<br>C    |
